# Supplementary material for: Distribution, fractionation and sources of rare earth elements in suspended particulate matter in a tropical agricultural catchment, northeast Thailand
Source: PeerJ. 2021 Feb 24;9:e10853. doi: 10.7717/peerj.10853 (PMC7912669; doi:10.7717/peerj.10853)
Supplement: Supplemental Information 1 [file peerj-09-10853-s001.xlsx]

## Sheet: Sheet1
	No.	Lat.	Log.	Alt.	La	Ce	Pr	Nd	Sm	Eu	Gd	Tb	Dy	Ho	Er	Tm	Yb	Lu	∑REE	∑LREE	∑MREE	∑HREE	Fe	Mn	Fe+Mn	Al	Ca	Mg	K	Na	pHa	ORPa	DOCa
		°N	°E	m	mg/kg																		g/kg									mv	mg/L
upper reaches	1	14.43	102.09	222	65.2	124	15	70.2	14.96	3.18	12.91	1.44	8.07	1.41	3.98	0.47	3.42	0.34	324.5	274.3	41.97	8.2	121.2	19.4	140.7	63.5	17.8	9.9	18.5	2.7	7.4	252	10.4
	2	14.47	102.12	221	56.6	96.6	10.7	42.5	7.7	1.47	6.93	0.83	5.04	0.96	2.91	0.39	2.86	0.35	235.9	206.4	22.94	6.52	37.3	4.1	41.4	70.8	7.3	6.1	15	2.3	7	265	7.1
	3	14.56	102.17	201	57.4	104.6	12.3	52.8	10.49	2.17	9.34	1.21	7.01	1.29	3.93	0.52	3.72	0.49	267.2	227	31.51	8.67	94.2	2.1	96.3	113.1	5.3	7	14.2	1.7	6.8	207	11.4
	4	14.75	102.21	186	46.6	89.5	9.8	37.5	8.53	1.94	7.88	1.07	6.27	1.21	3.63	0.5	3.47	0.48	218.2	183.3	26.9	8.08	62.4	1.5	64	115.5	5.8	7.6	13	2.2	7.5	181	10.3
	5	14.97	102.24	178	24.7	44.9	5.5	21	4.44	1.04	4.38	0.66	4	0.82	2.49	0.37	2.4	0.36	117.1	96.1	15.34	5.63	55	0.9	55.9	125.8	5.3	7	12.5	1	7.5	250	12.3
	6	15.16	102.37	159	32.5	69.1	7.5	26.9	6.06	1.38	5.93	0.82	4.92	0.98	2.91	0.41	2.74	0.38	162.5	136	20.09	6.44	58.9	2.9	61.8	116.2	6.2	6.8	12	3.4	7.3	280	14.3
	7	15.22	102.43	152	39.3	81	8.7	33.4	6.66	1.52	6.31	0.82	5.13	0.96	2.91	0.39	2.67	0.35	190.1	162.4	21.4	6.32	43.3	19.7	63	96.1	14.4	8.6	14.9	22	7.7	279	17.2
	8	15.25	102.53	153	43.6	98.6	9.8	35.6	7.93	1.86	7.55	1.04	6.14	1.19	3.58	0.49	3.22	0.45	221	187.5	25.71	7.73	59.6	24.7	84.3	107.2	9.5	6.3	10.5	6.2	7.7	260	14.4
	9	14.49	101.68	393	26.8	47.4	6.4	28.7	6.56	1.79	6.75	0.99	6.25	1.28	3.92	0.55	3.91	0.56	141.8	109.2	23.63	8.94	63.6	1.1	64.6	147.4	4.3	3.9	9.5	1.9	7.3	289	8.9
	10	14.95	101.99	194	48.3	96.6	10.8	40	8.82	2	8.43	1.15	6.88	1.35	3.98	0.53	3.69	0.51	233.1	195.7	28.63	8.72	51.6	2.5	54.1	108.3	15.3	8.2	15.1	5.3	8.2	206	11.3
	11	15.07	102.4	168	32.9	62.1	7.3	28.6	5.97	1.5	5.97	0.84	5.1	0.97	2.9	0.41	2.69	0.37	157.5	130.8	20.35	6.36	58.7	18.1	76.8	115	8.5	4.8	2.3	1.6	7.7	271	11.8
	12	14.51	101.38	389	42.1	74.2	9.6	41.7	8.58	1.97	8.34	1.05	6.4	1.23	3.73	0.48	3.4	0.43	203.2	167.6	27.57	8.03	138.1	4.4	142.5	81.6	12.9	6.1	11.5	3.2	7.1	235	4.6
	13	14.93	101.95	194	47	98.6	10.6	40	8.59	1.88	8.23	1.12	6.75	1.29	3.83	0.53	3.61	0.5	232.5	196.2	27.86	8.46	50.6	2.8	53.4	105.6	13	7.6	14.9	4	7.8	273	11.4
middle reaches	14	15.37	102.75	150	37.5	70.5	7.1	31.1	6.56	1.58	6.12	0.9	4.91	1.02	2.88	0.49	2.71	0.4	173.8	146.2	21.08	6.49	41.4	10.6	52	112.5	8.5	6	8.6	6.2	7.9	262	11.6
	15	15.44	103.01	140	47.9	84.5	8.5	37	7.94	1.85	7.49	1.03	5.94	1.17	3.45	0.54	3.17	0.44	210.9	177.9	25.43	7.6	43.9	1.1	45.1	125.5	5.5	5.7	8.2	2.5	7.6	262	11.2
	16	15.3	103.29	141	36.7	65.1	7.2	31	6.26	1.51	5.78	0.94	4.42	0.99	2.48	0.41	2.22	0.39	165.4	140	19.91	5.49	88.4	10.2	98.6	74.1	13.6	5.3	8.3	28.9	7.5	51	10.7
	17	15.3	103.6	131	40.1	68.2	8.2	35.3	6.76	1.64	6.18	1.05	4.87	1.13	2.79	0.44	2.61	0.44	179.7	151.8	21.62	6.27	44.5	5.7	50.2	119.1	9.7	6.5	8.1	16.2	7.9	267	10.3
	18	15.33	103.68	134	87.9	152.4	17.2	65.1	13.25	3.17	12.83	1.76	9.74	1.86	5.67	0.89	5.14	0.78	377.8	322.7	42.61	12.49	83.5	6.8	90.3	218.8	22	14.2	15.7	48.8	7.8	239	8.7
	19	15.46	103.89	130	39.4	64.6	7.2	27.5	5.92	1.43	5.66	0.84	4.83	0.98	2.95	0.49	2.9	0.43	165.1	138.7	19.65	6.77	44.3	0.7	45	135	5.7	5.3	5.8	2.3	7.5	285	9.1
	20	15.34	104.15	124	33.7	56.9	7.2	29	5.29	1.33	4.92	0.9	3.88	0.79	2.09	0.31	2	0.37	148.6	126.8	17.11	4.77	35.8	10.4	46.2	76.8	16.9	7	9	27.2	8.5	245	12.8
	21	15	102.82	165	38.7	71	7.4	32.7	6.84	1.63	6	0.96	4.79	1.04	2.73	0.38	2.47	0.4	177.1	149.8	21.27	5.99	44.3	23.9	68.2	103.9	12	5.2	5.8	6.8	7.4	287	11.4
	22	15.3	103.2	136	50.8	84.3	9.4	41.1	8.94	2.3	8.23	1.09	6.19	1.18	3.51	0.53	3.17	0.44	221.2	185.6	27.94	7.66	60.5	1.8	62.3	128.3	5.3	4.1	2.3	1.6	6.9	206	9.7
	23	15.14	103.43	138	48.3	81.5	8.9	36.5	7.33	1.75	6.94	0.99	5.44	1.09	3.15	0.52	2.94	0.44	205.7	175.1	23.54	7.05	43.3	9	52.3	108	8.2	4.2	5.3	2.4	7.2	262	7.7
	24	15.47	104.07	119	44.5	72.2	9	37.1	6.99	1.78	6.6	1.23	5.22	1.1	2.99	0.45	2.88	0.5	192.5	162.8	22.92	6.81	70.7	26.9	97.7	90.3	11.5	4.9	4.8	23.7	7.7	261	10.7
	25	15.33	104.04	122	79.9	129.7	17	65.3	11.84	3.02	11.04	2.08	8.53	1.74	4.62	0.74	4.45	0.76	340.7	291.9	38.25	10.58	200.4	65.2	265.7	145.3	28.4	10.3	13	20.1	7.6	218	9.9
	26	15.11	104.68	121	41.7	79.7	8.5	29.6	6.23	1.41	6.13	0.91	4.87	0.98	2.89	0.48	2.73	0.47	186.6	159.5	20.55	6.57	70.8	8.5	79.3	119.2	5.4	4.4	7.7	2.1	6.3	339	9.2
	27	14.88	103.38	143	39.1	64.5	7.6	35.3	6.32	1.61	5.96	0.82	4.74	0.89	2.73	0.42	2.49	0.36	172.8	146.4	20.35	6	42.2	3.6	45.8	130	3.8	4.7	6.5	1.1	7.1	284	6.5
	28	14.86	103.48	148	42.1	69.1	8.1	30.6	6.06	1.37	5.79	0.82	4.58	0.91	2.68	0.46	2.56	0.42	175.5	149.9	19.53	6.12	41.1	0.5	41.6	137.7	5.4	3.6	3.7	0.4	6.9	323	4.5
	29	15.57	103.82	125	33.3	56.2	5.9	23.5	4.88	1.19	4.78	0.72	4.15	0.86	2.6	0.43	2.55	0.39	141.5	119	16.57	5.98	71.7	4.9	76.6	113.5	7.6	4	5.3	2.5	6.1	334	8.3
	30	15.05	104.02	126	35.3	56.2	6.9	25.6	5.18	1.22	5.07	0.75	4.25	0.86	2.65	0.44	2.54	0.41	147.4	124.1	17.32	6.04	54.8	2.5	57.3	118.2	3	3.8	3.4	2.3	6.6	310	9.8
	31	15.01	104.13	131	46.1	73.3	8.7	32.6	6.51	1.46	6.33	0.85	4.86	0.94	2.88	0.46	2.69	0.43	188	160.6	20.94	6.47	63.8	6.3	70.1	132	5.1	3.7	4.9	1.2	6.7	336	8
	32	15.01	104.63	123	52.6	90.6	9.5	47.6	8.42	1.96	7.63	1.02	5.41	1.05	3.04	0.47	2.62	0.44	232.3	200.3	25.48	6.57	63	5.9	68.9	109.6	8.7	6	9.8	1.9	7.2	251	6.7
lower reaches	33	15.21	104.76	117	33.9	58.9	6.1	31.2	5.42	1.15	5.34	0.65	3.71	0.7	2.21	0.32	2.07	0.31	152.1	130.2	16.98	4.92	44.4	1.7	46.1	112.4	6.7	7.7	14.4	2.2	7.7	245	6.8
	34	15.21	104.81	126	34.1	59.9	6.2	31.5	5.51	1.16	5.02	0.68	3.84	0.72	2.21	0.33	2.1	0.32	153.5	131.6	16.93	4.96	44.1	1.3	45.4	116.6	6.5	7.7	14.1	1.5	7.8	234	6.9
	35	15.22	104.86	112	39.5	70	7.1	35.4	6.25	1.32	5.76	0.77	4.25	0.84	2.51	0.38	2.38	0.37	176.9	152	19.18	5.64	47.8	1.5	49.3	123.4	7.5	8.4	15.6	2.5	7.6	252	12.6
	36	15.31	105.12	115	33.3	58.2	6	30.1	5.27	1.14	4.82	0.66	3.66	0.72	2.19	0.34	2.05	0.33	148.8	127.6	16.27	4.91	42.3	1	43.3	120	6.5	7.8	14.1	1.9	7.6	250	7.1
	37	15.27	105.22	114	32.5	55.5	5.8	24.1	5.02	1.09	4.65	0.63	3.49	0.69	2.05	0.33	1.94	0.31	138.1	117.9	15.56	4.62	39.8	1	40.7	112.4	7.3	7.5	13.8	2.7	7.6	249	7
	38	15.29	105.34	96	40	71.4	7.4	30.8	6.43	1.38	6	0.85	4.54	0.9	2.6	0.38	2.51	0.38	175.7	149.7	20.1	5.88	50.9	1.2	52.2	124.3	7.2	8.2	16.6	2.2	7.3	263	8
	39	15.26	105.44	108	40.4	75.3	8	32.4	6.87	1.63	6.44	1.04	4.99	1.09	3.07	0.44	2.9	0.46	185.1	156.2	22.07	6.86	64.8	1	65.8	149.1	9.5	9.2	18.1	4.7	7.6	227	7.9
	40	15.31	105.49	112	34.9	66.2	6.9	28.8	5.99	1.38	5.5	0.85	4.13	0.89	2.53	0.37	2.33	0.36	161.2	136.9	18.74	5.59	50.2	1.5	51.7	115.7	11.7	8.4	15.4	6.5	7.5	225	8.1
	41	15.27	104.64	123	34.1	65.8	7	31.5	5.45	1.23	5.32	0.75	4.01	0.87	2.32	0.37	2.17	0.36	161.3	138.4	17.64	5.22	45.8	1.8	47.6	110.4	5.8	7.4	14.1	1.8	7.2	290	7.4
	42	15.29	104.74	117	37.1	70.8	7.2	24.5	5.19	1.15	5.11	0.77	3.92	0.79	2.28	0.37	2.06	0.37	161.5	139.5	16.93	5.08	49.7	14	63.8	106.7	5.8	6.2	10.2	6.8	7.2	303	7.2
	43	15.34	105.08	119	33.9	59.5	6.6	28.4	5.52	1.45	4.96	0.88	3.56	0.76	2.09	0.3	1.8	0.32	150	128.4	17.12	4.51	51.2	12.3	63.4	93.8	19.8	10.1	14	12.2	7.9	222	7.3
	44	15.23	105.16	118	29.9	55.1	5.4	22.1	5.08	1.21	4.31	0.62	3	0.61	1.67	0.25	1.47	0.24	130.9	112.4	14.83	3.63	50.8	51.8	102.6	58.2	13.2	5.6	12.3	1.9	6.9	287	5.7
	45	15.23	105.3	109	49.6	98	9.2	46.4	7.96	1.58	7.44	0.95	5.12	1.01	2.99	0.47	2.87	0.44	234	203.2	24.05	6.77	90.7	2.2	92.8	105.2	5.6	6.8	16.3	1.1	6.5	330	7.9
	46	15.5	104.6	128	17.3	32	3.9	14.2	2.6	0.7	2.56	0.48	1.99	0.43	1.17	0.16	0.99	0.16	78.5	67.3	8.75	2.48	67.9	20.6	88.5	99.4	12.2	8	13.5	9.2	7.1	295	6.7
	47	15.5	104.97	119	40.7	68.6	8.6	36.6	7.16	2.16	6.46	0.96	4.55	1.06	2.59	0.34	1.92	0.36	182	154.5	22.34	5.21	138.6	56	194.6	77.7	21.1	11.3	15.5	13.4	7.7	203	7.3
Mekong River	48	15.32	105.55	107	45.6	88.9	9.8	45.9	8.55	1.73	7.73	1.01	5.41	1.02	3.03	0.47	2.77	0.41	222.3	190.2	25.45	6.69	53.6	1.5	55	116.2	3.3	8.6	21.2	2.4	7.6	173	2.6
Note: ∑REE refer to total rare earth elements content; ∑LREE refer to light rare earth elements content (La-Nd); ∑MREE refer to middle rare earth elements content (Sm-Dy); ∑HREE refer to heavy rare earth elements content (Ho-Yb).
a pH, ORP, and DOC data are from Liu et al. (2019)
